# Supplementary material for: Cuticle Secretion Duration in the Uterus Is One of the Major Factors Affecting Eggshell Cuticle Deposition in White Leghorn Laying Hens
Source: Research Square preprint supplement (doi:10.21203/rs.3.rs-124583/v1), 2020-12-11
Supplement: Supplementary file 1 [file 5e585f9f2b5ada0ca2c8255b.xlsx]

## Sheet: Sheet1
Additional file 2: Table S1. An overview for RNA-Seq data of uterine tissues of GC and PC group hens
Group	Sample	Raw_Reads	Clean_Reads	Clean_Bases	Error_Rate (%)	Q20 (%)	Q30 (%)	Gc_Pct (%)
GC	G_10	44393810	43254406	6.49G	0.03	97.16	92.74	49.53
	G_17	48516666	44866314	6.73G	0.03	97.49	93.45	50.81
	G_29	49266666	46309088	6.95G	0.03	97.34	93.18	50.4
	G_37	52726666	50293592	7.54G	0.03	97.3	93.06	50.57
	G_49	62940074	58007844	8.7G	0.03	97.11	92.6	49.72
	G_110	64808242	62176528	9.33G	0.03	97.08	92.61	49.87
	G_134	54301818	52837774	7.93G	0.03	97.23	92.87	50.3
PC	P_97	58020976	57063522	8.56G	0.03	97	92.33	49.81
	P_178	64658820	63688584	9.55G	0.03	97.08	92.54	50.23
	P_184	60584332	59064708	8.86G	0.03	96.85	92.37	53.52
	P_197	53823508	52549156	7.88G	0.03	96.99	92.43	50.06
